# Supplementary material
Source: HighWire-hosted journal article supplement (http://molpharm.aspetjournals.org/highwire/filestream/77487/field_highwire_adjunct_files/0/Supplemental_104182.pdf)
Supplement: Supplemental_104182.pdf [file Supplemental_104182.pdf]

**Molecular Mechanisms of Action of M<sub>5</sub> Muscarinic Acetylcholine Receptor Allosteric Modulators** Alice Berizzi, Patrick R. Gentry, Patricia Rueda, Sandra den Hoedt, Patrick M. Sexton, Christopher J Langmead & Arthur Christopoulos, *Molecular Pharmacology*

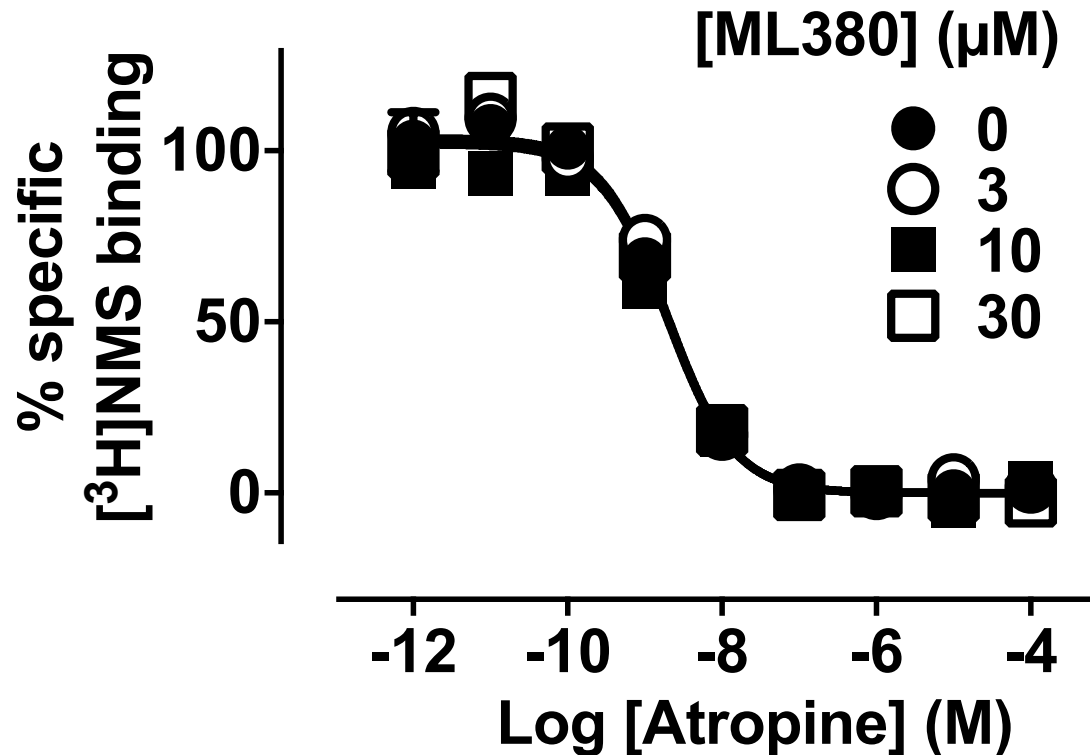

**FIGURE S1**

Three-way radioligand binding studies to demonstrate the effect of ML380 (0.3 - 30  $\mu\text{M}$ ) on atropine-mediated inhibition of  $[^3\text{H}]\text{-NMS}$  binding in whole CHO-hM<sub>5</sub> cells. Cells were incubated with radioligand for 2h at 37°C; data are expressed as a % of control specific binding and represent the mean  $\pm$  SEM three independent experiments performed in triplicate. Fitted curves are from global analysis of datasets according to Equation 4 (in Methods) with parameter estimates shown in the Results.
